# Supplementary material for: Potential Valorization of Edible Nuts By-Products: Exploring the Immune-Modulatory and Antioxidants Effects of Selected Nut Shells Extracts in Relation to Their Metabolic Profiles
Source: MDPI journal article supplement (doi:10.3390/antiox11030462), 2022-02-25
Supplement: s1 [file s1]

**Table S1.** The sequence of primer used in the study

| Target gene<br>(HGNC ID) | Primer name                          | Primer sequence from (5' to 3')                                    |
|--------------------------|--------------------------------------|--------------------------------------------------------------------|
| NF-K $\beta$<br>(7794)   | <u>NF-KB F</u><br><u>NF-KB R</u>     | 5'- AGGCAAGGAATAATGCTGTCCTG -3'<br>5'- ATCATTCTCTAGTGTCTGGTTGG -3' |
| COX-2<br>(9605)          | COX-2 F<br>COX-2 R                   | 5'-ATCATTACACAGGCAAATTGC-3'<br>5'- GGCTTCAGCATAAAGCGTTTG -3'       |
| iNOS<br>(7873)           | iNOS F<br>iNOS R                     | 5'- GCTCTACACCTCCAATGTGACC -3'<br>5'- CTGCCGAGATTTGAGCCTCATG -3'   |
| SP-1<br>(11205)          | SP-1 F<br>SP-1 R                     | 5'- TTGAAAAAGGAGTTGGTGGC -3'<br>5'- TGCTGGTTCTGTAAGTTGGG -3'       |
| AP-1<br>(1258)           | AP-1 F<br>AP-1 R                     | 5'- TGTTACTCTTTCCCTCTCTGCTGG -3'<br>5'- GCCACATACAACCAGGGAGTCA -3' |
|                          | $\beta$ -actin F<br>$\beta$ -actin R | 5'-GTGACATCCACACCCAGAGG-3'<br>5'-ACAGGATGTCAAAACTGCCC-3'           |

**Table S2.** Metabolites identified from nut shell extracts based on the UPLC/MS data.

| Number | Putative compound Name                          | Formula     | RT (min.) | Detected m/z | Delta (ppm) |
|--------|-------------------------------------------------|-------------|-----------|--------------|-------------|
| 1.     | 3-carboxy-2-hydroxy Phenylalanine               | C10H11NO5   | 3.28      | 226.0694     | -11.8       |
| 2.     | 4-Pyridoxic Acid                                | C8H9NO4     | 4.78      | 184.061      | -2.78       |
| 3.     | 6-C-Prenylapigenin                              | C20H18O5    | 13.3      | 383.1138     | 0.53        |
| 4.     | 6-Hydroxynicotinic Acid                         | C6H5NO3     | 2.68      | 140.0343     | -6.92       |
| 5.     | alpha-Ketoglutaric acid                         | C5H6O5      | 1.07      | 191.0192     | -2.86       |
| 6.     | Apigenin                                        | C15H10O5    | 7.88      | 271.0615     | 0.98        |
| 7.     | Benzyl gentiobioside                            | C19H28O11   | 4.81      | 477.1617     | 0.73        |
| 8.     | Butanediol apiosylglucoside                     | C15H28O11   | 3.04      | 429.1616     | 0.46        |
| 9.     | Butanol Apiofuranosyl glucopyranoside           | C15H28O10   | 4.03      | 413.1669     | 1.09        |
| 10.    | Caftaric acid                                   | C13H12O9    | 7.83      | 358.0571     | 8.12        |
| 11.    | Catechin                                        | C15H14O6    | 4.98      | 335.0756     | -4.92       |
| 12.    | Chicoric acid                                   | C22H18O12   | 6.64      | 475.0848     | -7.2        |
| 13.    | Citric acid                                     | C6H8O7      | 1.12      | 193.0348     | -3.19       |
| 14.    | Coumaric acid                                   | C9H8O3      | 4.86      | 165.0549     | -5.13       |
| 15.    | Coutaric acid                                   | C13H12O8    | 4.83      | 297.0607     | -3.1        |
| 16.    | Cyanidin 3-(6-acetylgalactoside)                | C23H22O12   | 6.43      | 491.12       | 1.01        |
| 17.    | Dicaffeoyl quinolactone                         | C25H22O11   | 7.92      | 544.1335     | 20.78       |
| 18.    | Dihydroxy dimethoxy prenylflavanone             | C22H24O6    | 4.87      | 385.1635     | -5.5        |
| 19.    | Dihydroxy prenylflavanone                       | C20H20O5    | 12.97     | 385.1298     | 1.34        |
| 20.    | Dihydroxy-1-benzopyran-2-one                    | C9H6O4      | 4.97      | 179.0343     | -3.63       |
| 21.    | Dihydroxy-methoxy-hydroxybenzylidihydrochalcone | C23H22O5    | 15.31     | 379.1476     | -19.82      |
| 22.    | Epicatechin isomer                              | C15H14O6    | 7.87      | 291.0876     | 0.49        |
| 23.    | Epicatechin methylgallate                       | C23H20O10   | 6.21      | 501.102      | -3.77       |
| 24.    | Epicatechin-catechin                            | C30H24O12   | 8.28      | 577.1477     | 21.76       |
| 25.    | Epigallocatechin methylgallate                  | C23H20O11   | 3.76      | 473.1138     | 10.28       |
| 26.    | Eriodictyol dimethyl ether                      | C17H16O6    | 12.84     | 317.1033     | 0.76        |
| 27.    | Eriodictyol glucoside                           | C21H22O11   | 5.71      | 451.1185     | -13.56      |
| 28.    | Fertaric acid                                   | C14H14O9    | 5.23      | 327.0726     | 1.46        |
| 29.    | Feruloylglucose trihydroxy methylbutylglycoside | C21H30O12   | 6.22      | 475.1923     | 21.51       |
| 30.    | Galactopinitol B                                | C13H24O11   | 0.67      | 401.1304     | 0.92        |
| 31.    | Galloylglucose                                  | C13H16O10   | 2.98      | 333.081      | -5.27       |
| 32.    | Glutamic Acid                                   | C5H9NO4     | 0.66      | 148.0607     | -5.62       |
| 33.    | Glutathione (reduced)                           | C10H17N3O6S | 1.14      | 308.099      | 22.04       |
| 34.    | Gravelliferone                                  | C19H22O3    | 13.78     | 299.159      | -20.96      |
| 35.    | Hesperidin                                      | C28H34O15   | 7.33      | 611.1995     | 2.16        |
| 36.    | Hydroxy jasmonic acid glucoside                 | C18H28O9    | 5.64      | 389.182      | 0.85        |
| 37.    | Hydroxy tetramethoxystilbene                    | C17H18O5    | 7.87      | 347.114      | 1.03        |
| 38.    | Hydroxybdihydrojasmonic acid glucoside          | C18H30O9    | 5.94      | 391.1977     | 0.94        |
| 39.    | Hydroxy-dimethoxyflavanone rhamnoside           | C23H26O9    | 1.06      | 491.1634     | 15.28       |
| 40.    | Hydroxykaempferol                               | C15H10O7    | 9.4       | 303.0511     | 0.3         |
| 41.    | Hydroxylinolenic acid                           | C18H32O3    | 14.22     | 297.2437     | 0.45        |
| 42.    | Hydroxy-methoxyflavone                          | C16H12O4    | 11.8      | 269.0821     | 0.71        |
| 43.    | Isocitric acid                                  | C6H8O7      | 1.28      | 193.0348     | -3.19       |
| 44.    | isopropylapiosyl glucoside                      | C14H26O10   | 3.3       | 399.151      | 0.58        |
| 45.    | Kaempferol glucoside                            | C21H20O11   | 7.41      | 449.1094     | 0.98        |
| 46.    | Kaempferol rutinoside                           | C27H30O15   | 5.67      | 595.1571     | -16.36      |
| 47.    | Kushenol C                                      | C25H26O7    | 5.79      | 439.1739     | -5.25       |
| 48.    | Linalool oxide primeveroside                    | C21H36O11   | 6.1       | 509.2242     | 0.43        |
| 49.    | Linalool xylosyl-glucoside                      | C21H36O10   | 9.35      | 493.2297     | 1.33        |
| 50.    | Linolenic acid                                  | C18H30O2    | 14.57     | 279.2331     | 0.5         |

|     |                                                 |             |       |          |        |
|-----|-------------------------------------------------|-------------|-------|----------|--------|
| 51. | luteolin                                        | C15H10O6    | 9.42  | 287.0562 | 0.36   |
| 52. | Luteolin diglucoside                            | C15H10O6    | 9.4   | 287.0562 | 0.25   |
| 53. | Malvidin malonylglucoside                       | C26H26O15   | 6.47  | 579.1362 | 1.19   |
| 54. | Methoxy Kaempferol                              | C16H12O7    | 8.98  | 317.0666 | -0.18  |
| 55. | Methyl epicatechin glucuronide isomer           | C22H24O12   | 6.52  | 481.1334 | -3.72  |
| 56. | Methylkaempferol                                | C16H12O6    | 10.8  | 301.072  | 0.66   |
| 57. | Moracin I                                       | C20H20O4    | 12.84 | 369.1343 | -0.06  |
| 58. | Myricetin trimethyl ether                       | C18H16O8    | 7.43  | 361.0929 | 0.01   |
| 59. | N-Acetyl-Proline                                | C7H11NO3    | 3.72  | 202.0715 | -3.09  |
| 60. | Naringenin neohesperidoside                     | C27H32O14   | 7.3   | 581.1879 | 0.6    |
| 61. | Octadecadienoic acid                            | C18H32O2    | 13.9  | 325.2383 | -0.37  |
| 62. | Octadecendioic acid                             | C18H34O4    | 13.43 | 315.2542 | 0.41   |
| 63. | Oleic acid                                      | C18H34O2    | 14.79 | 327.2543 | 0.77   |
| 64. | Parvisoflavone A                                | C20H16O6    | 12.62 | 353.1032 | 0.51   |
| 65. | Phenylalanine                                   | C9H11NO2    | 3.32  | 210.0768 | -1.68  |
| 66. | PI (18:2/0:0)                                   | C27H49O12P  | 13.89 | 597.3131 | 14.35  |
| 67. | Proanthocyanidin A1                             | C30H24O12   | 9.16  | 577.1257 | -16.42 |
| 68. | Proanthocyanidin A5'                            | C30H24O12   | 6     | 622.148  | 24.44  |
| 69. | Proline                                         | C5H9NO2     | 0.74  | 116.0706 | -9.41  |
| 70. | Pumilaisoflavone                                | C27H28O7    | 5.78  | 509.1804 | -2.64  |
| 71. | Quercetin acetyl-glucoside                      | C23H22O13   | 7.34  | 507.1141 | -0.55  |
| 72. | Quercetin galactoside                           | C20H18O12   | 7.37  | 495.0756 | -4.86  |
| 73. | Quercetin galacturonide                         | C21H18O13   | 5.9   | 479.0856 | 5.26   |
| 74. | Quercetin glucoside                             | C21H20O12   | 7.01  | 465.1045 | 1.45   |
| 75. | Quercetin methyl ether glucoside                | C22H22O12   | 6.77  | 479.1202 | 1.48   |
| 76. | Quercetin-rhamnose-glucoside                    | C27H30O16   | 6.79  | 611.1583 | -5.62  |
| 77. | Resveratrol glucoside                           | C20H22O8    | 6.16  | 391.1404 | 1.46   |
| 78. | S-Adenosylhomocysteine                          | C14H20N6O5S | 2.49  | 429.1252 | 12.57  |
| 79. | Secoisolariciresinol glucoside                  | C26H36O11   | 7.27  | 569.2247 | 1.24   |
| 80. | Tetrahydroxy prenylflavone                      | C20H18O6    | 12.44 | 355.1189 | 0.61   |
| 81. | Tetrahydroxyisoflavanone                        | C15H12O6    | 9.17  | 333.0617 | 0.35   |
| 82. | Tetrahydroxy-prenylflavone                      | C20H18O6    | 13.05 | 355.119  | 0.86   |
| 83. | Tetramethoxychalcone glucoside isomer           | C25H30O11   | 1.09  | 551.1732 | -7     |
| 84. | Theviridoside                                   | C17H24O11   | 4.9   | 405.1404 | 0.51   |
| 85. | Trehalose                                       | C12H22O11   | 0.71  | 387.1146 | 0.39   |
| 86. | Trihydroxy methoxydihydrochalcone               | C16H16O5    | 7.25  | 333.0985 | 1.61   |
| 87. | Trihydroxy methoxyprenylisoflavone              | C21H20O6    | 13.16 | 369.1343 | -0.06  |
| 88. | Trihydroxydihydro-linalyl oxide glucopyranoside | C16H30O10   | 16.02 | 383.1895 | -7.11  |
| 89. | Trihydroxyflavanone                             | C15H12O5    | 10.35 | 317.067  | 1.07   |
| 90. | Trihydroxy-octadecenoic acid                    | C18H34O5    | 11.41 | 331.2494 | 1.09   |
| 91. | Tryptophan                                      | C11H12N2O2  | 4.39  | 249.0853 | -11.11 |
| 92. | Valine                                          | C5H11NO2    | 1     | 162.0766 | -3.78  |
| 93. | Vanillin acetate                                | C10H10O4    | 5.28  | 195.0657 | -2.81  |

**Table S3.** 2D pictures describing the binding interactions of the selected compounds accumulating in peanut shells (**1-13**) towards the binding pocket of iNOS compared to the co-crystallized inhibitor, CLW (**14**).

| No. | Compound                   | 2D binding interactions                                                                                                                                                                                                                                                                                                                                                                                                                                                                                                                                                                                                                                                                                                                                                                     |
|-----|----------------------------|---------------------------------------------------------------------------------------------------------------------------------------------------------------------------------------------------------------------------------------------------------------------------------------------------------------------------------------------------------------------------------------------------------------------------------------------------------------------------------------------------------------------------------------------------------------------------------------------------------------------------------------------------------------------------------------------------------------------------------------------------------------------------------------------|
| 1   | Epicatechin                | 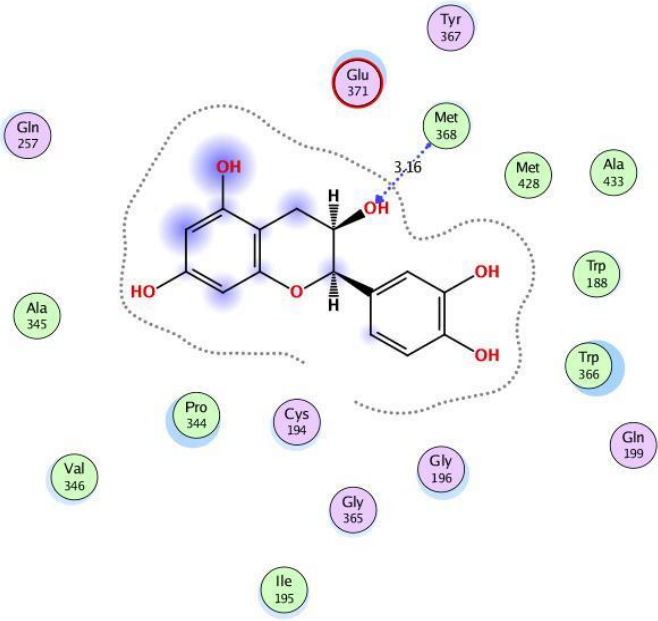 <p>The diagram illustrates the binding of Epicatechin (a flavan-3-ol) within the iNOS binding pocket. The molecule is shown with its characteristic chromane skeleton and multiple hydroxyl groups. Key interactions include a hydrogen bond between the 3'-OH group and the backbone of Met 368 (distance 3.16 Å). Other residues shown in the vicinity include Glu 371, Tyr 367, Met 428, Ala 433, Trp 188, Trp 366, Gln 199, Gly 196, Gly 365, Ile 195, Cys 194, Pro 344, Val 346, and Ala 345. The binding pocket is outlined by a dashed line.</p>                                                                                                                                                 |
| 2   | Epicatechin methyl gallate |  <p>The diagram illustrates the binding of Epicatechin methyl gallate (a gallate ester of Epicatechin) within the iNOS binding pocket. The molecule features a methyl gallate moiety attached to the chromane core. Key interactions include a hydrogen bond between the 3'-OH group and the backbone of Met 368 (distance 4.25 Å). Another interaction is shown between the ester oxygen and the backbone of Trp 366 (distance 3.75 Å). Other residues shown in the vicinity include Glu 371, Tyr 367, Met 428, Ala 433, Trp 188, Trp 366, Gln 199, Gly 196, Gly 365, Ile 195, Cys 194, Phe 363, Val 346, Ser 236, Asn 364, Arg 193, and Gln 257. The binding pocket is outlined by a dashed line.</p> |

|   |                      |  |
|---|----------------------|--|
| 3 | Proanthocyanidin A1  |  |
| 4 | Proanthocyanidin A5' |  |
| 5 | Kaempferol glucoside |  |

|   |                         |  |
|---|-------------------------|--|
| 6 | Kaempferol rutinoside   |  |
| 7 | Quercetin galactoside   |  |
| 8 | Hydroxy-methoxy flavone |  |

|    |                                      |                                                                                      |
|----|--------------------------------------|--------------------------------------------------------------------------------------|
| 9  | Tetrahydroxy prenylflavone           | 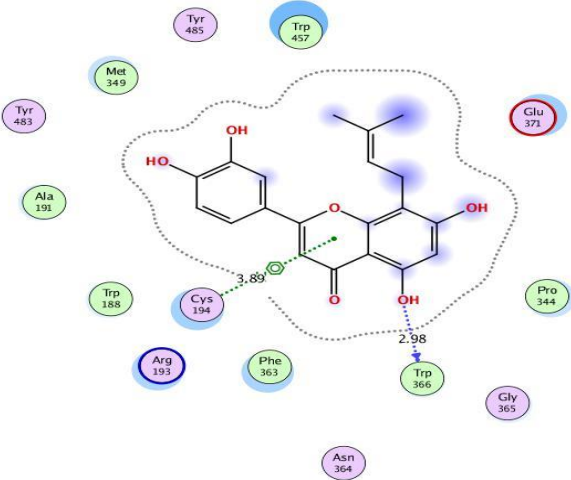   |
| 10 | Trihydroxy methoxy-prenyl isoflavone |   |
| 11 | 6-C-Prenylapigenin                   |  |

|    |                 |  |
|----|-----------------|--|
| 12 | Tryptophan      |  |
| 13 | Proline         |  |
| 14 | CLW<br>(docked) |  |



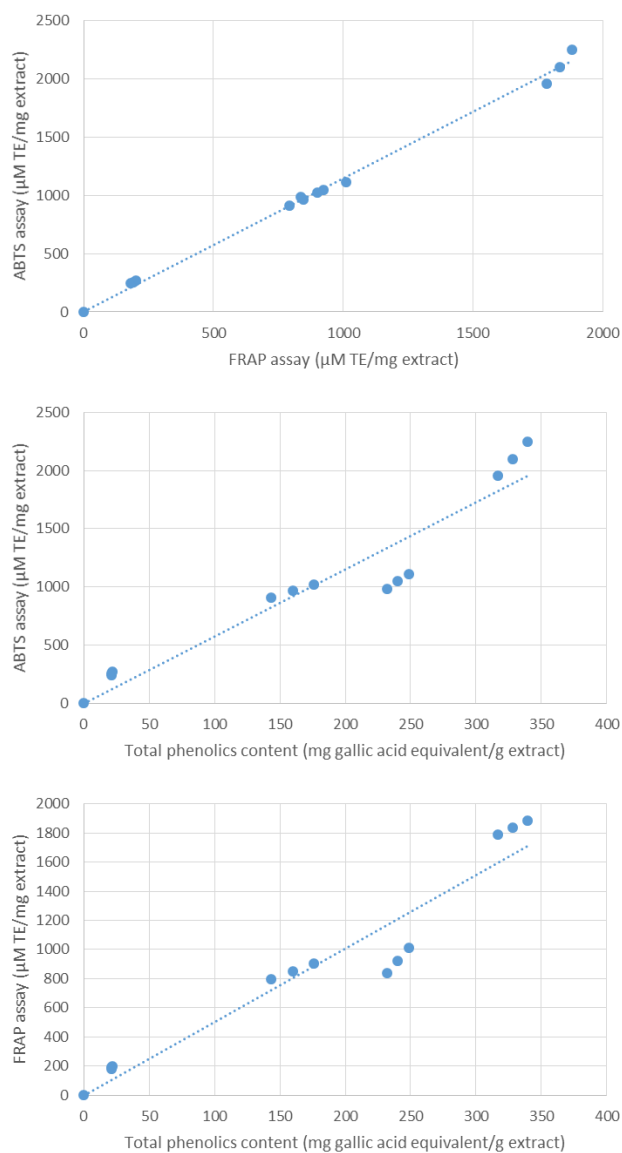

**Figure S1.** Correlation between the total phenolics contents and antioxidant potential of nut shell extracts

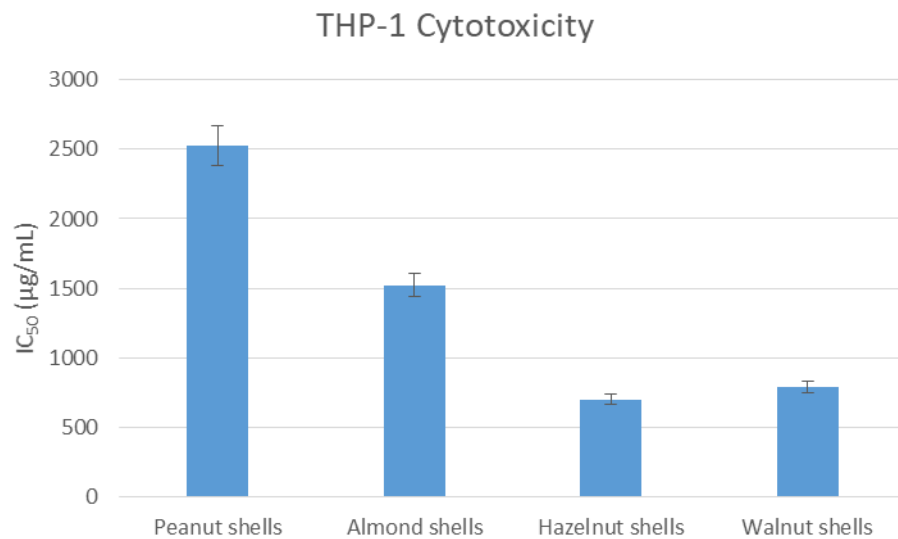

**Figure S2.** Effect of the nut shell extracts on the THP-1 cell viability using the MTT assay.
